# Supplementary material for: Childhood antibiotics as a risk factor for Crohn's disease: The ENIGMA International Cohort Study
Source: PubMed Central journal article supplement — JGH Open. 2022 Jun 1;6(6):369–77. doi: 10.1002/jgh3.12755 (PMC9218523; doi:10.1002/jgh3.12755), 2022-06-01
Supplement: JGH3-6-369-s006.pdf [file JGH3-6-369-s006.pdf]

# Environmental Questionnaire-IBD

Fill in date: \_\_\_/\_\_\_/\_\_\_ (dd/mm/yyyy)

Thank you for answering some questions. Your answer will help us understand more about inflammatory bowel disease (IBD).

1. Ethnicity :

- Chinese (Hong Kong)       Chinese (Mainland)       Caucasian
- Jewish       Others, please specify: \_\_\_\_\_

2. Where were you born?

- |                                          |                                          |                                                        |
|------------------------------------------|------------------------------------------|--------------------------------------------------------|
| <input type="checkbox"/> Hong Kong China | <input type="checkbox"/> Mainland China  | <input type="checkbox"/> Japan                         |
| <input type="checkbox"/> Korea           | <input type="checkbox"/> Indonesia       | <input type="checkbox"/> India                         |
| <input type="checkbox"/> Malaysia        | <input type="checkbox"/> Sri Lanka       | <input type="checkbox"/> Nepal                         |
| <input type="checkbox"/> Thailand        | <input type="checkbox"/> The Philippines | <input type="checkbox"/> The Middle East & Arab        |
| <input type="checkbox"/> Israel          | <input type="checkbox"/> Taiwan          | <input type="checkbox"/> Australia                     |
| <input type="checkbox"/> New Zealand     | <input type="checkbox"/> Pacific Islands | <input type="checkbox"/> Others, please specify: _____ |

3. Does anyone in your family have IBD?

- Yes, please select: Father / Mother / Siblings / Children / Half-sibling / Paternal grandfather / Paternal grandmother / Maternal grandfather / Maternal grandmother / Other, please specify: \_\_\_\_\_
- No
- Don't know

4. In what way did your mother give birth to you?

- Vaginal
- Caesarean-section
- Don't know

5. Were you breastfed as a baby?

- Yes : for \_\_\_\_\_ months
- No
- Don't know

6. Your highest education level now:

- No school
- Primary school
- Secondary school
- University

7. Your job now:

- |                                                                        |                                                        |                                                                                                |
|------------------------------------------------------------------------|--------------------------------------------------------|------------------------------------------------------------------------------------------------|
| <input type="checkbox"/> Agriculture and Fisheries                     | <input type="checkbox"/> Mining and quarrying industry | <input type="checkbox"/> Manufacturing                                                         |
| <input type="checkbox"/> Electricity, gas and water industry           | <input type="checkbox"/> Construction industry         | <input type="checkbox"/> Wholesale, retail, import/export, catering and hospitality industries |
| <input type="checkbox"/> Transportation, warehouse, postal and courier | <input type="checkbox"/> Information and communication | <input type="checkbox"/> Financial, insurance, real estate and business services               |
| <input type="checkbox"/> Community, social and personal services       | <input type="checkbox"/> Health/sciences               | <input type="checkbox"/> Others, specify: _____                                                |

8. Your living and working environment now (can choose more than one):

- |                                                 |                                             |                                           |
|-------------------------------------------------|---------------------------------------------|-------------------------------------------|
| <input type="checkbox"/> Near construction site | <input type="checkbox"/> Near mine          | <input type="checkbox"/> Near furnaces    |
| <input type="checkbox"/> Near factory           | <input type="checkbox"/> Near busy highways | <input type="checkbox"/> Use coal as fuel |

9. How often do smog occur in your living area in recent half a year?

- > 50%
- ≤ 50%

The following questions are regarding your condition at different age groups, please try to remember accurately or ask someone in your family. Put  next to the best answer.

|                                                                                                                                                                                  |                                                                                                                                                  |                                                                                                                                                         |
|----------------------------------------------------------------------------------------------------------------------------------------------------------------------------------|--------------------------------------------------------------------------------------------------------------------------------------------------|---------------------------------------------------------------------------------------------------------------------------------------------------------|
| 10. Did you take antibiotics in the following age groups?<br>0 – 12 months old<br>>12 months – 5 years old<br>>5 – 10 years old<br>>10 – 18 years old<br>Currently               | Yes<br><input type="checkbox"/><br><input type="checkbox"/><br><input type="checkbox"/><br><input type="checkbox"/><br><input type="checkbox"/>  | No<br><input type="checkbox"/><br><input type="checkbox"/><br><input type="checkbox"/><br><input type="checkbox"/><br><input type="checkbox"/>          |
| 11. Where did you live in the following age groups?<br>0 – 12 months old<br>>12 months – 5 years old<br>>5 – 10 years old<br>>10 – 18 years old<br>Currently                     | City<br><input type="checkbox"/><br><input type="checkbox"/><br><input type="checkbox"/><br><input type="checkbox"/><br><input type="checkbox"/> | Countryside<br><input type="checkbox"/><br><input type="checkbox"/><br><input type="checkbox"/><br><input type="checkbox"/><br><input type="checkbox"/> |
| 12. Was there running water in your house in the following age groups?<br>0 – 12 months old<br>>12 months – 5 years old<br>>5 – 10 years old<br>>10 – 18 years old<br>Currently  | Yes<br><input type="checkbox"/><br><input type="checkbox"/><br><input type="checkbox"/><br><input type="checkbox"/><br><input type="checkbox"/>  | No<br><input type="checkbox"/><br><input type="checkbox"/><br><input type="checkbox"/><br><input type="checkbox"/><br><input type="checkbox"/>          |
| 13. Did your house have hot water from tap in the following age groups?<br>0 – 12 months old<br>>12 months – 5 years old<br>>5 – 10 years old<br>>10 – 18 years old<br>Currently | Yes<br><input type="checkbox"/><br><input type="checkbox"/><br><input type="checkbox"/><br><input type="checkbox"/><br><input type="checkbox"/>  | No<br><input type="checkbox"/><br><input type="checkbox"/><br><input type="checkbox"/><br><input type="checkbox"/><br><input type="checkbox"/>          |
| 14. Was there a flushing toilet in your house                                                                                                                                    | Yes                                                                                                                                              | No                                                                                                                                                      |

|                                                                                                                                                                                                                                                                                           |                                                                                                                                                                                                                                                                 |                                                                                                                                                                           |
|-------------------------------------------------------------------------------------------------------------------------------------------------------------------------------------------------------------------------------------------------------------------------------------------|-----------------------------------------------------------------------------------------------------------------------------------------------------------------------------------------------------------------------------------------------------------------|---------------------------------------------------------------------------------------------------------------------------------------------------------------------------|
| <p>in the following age groups?</p> <p>0 – 12 months old</p> <p>&gt;12 months – 5 years old</p> <p>&gt;5 – 10 years old</p> <p>&gt;10 – 18 years old</p> <p>Currently</p>                                                                                                                 | <p><input type="checkbox"/></p> <p><input type="checkbox"/></p> <p><input type="checkbox"/></p> <p><input type="checkbox"/></p> <p><input type="checkbox"/></p>                                                                                                 | <p><input type="checkbox"/></p> <p><input type="checkbox"/></p> <p><input type="checkbox"/></p> <p><input type="checkbox"/></p> <p><input type="checkbox"/></p>           |
| <p>15. Did you keep any animals in the house, garden or farm in the following age groups?</p> <p>0 – 12 months old</p> <p>&gt;12 months – 5 years old</p> <p>&gt;5 – 10 years old</p> <p>&gt;10 – 18 years old</p> <p>Currently</p>                                                       | <p>Yes</p> <p><input type="checkbox"/></p> <p><input type="checkbox"/></p> <p><input type="checkbox"/></p> <p><input type="checkbox"/></p> <p><input type="checkbox"/></p>                                                                                      | <p>No</p> <p><input type="checkbox"/></p> <p><input type="checkbox"/></p> <p><input type="checkbox"/></p> <p><input type="checkbox"/></p> <p><input type="checkbox"/></p> |
| <p>16. Did you smoke in the following age groups? (Smoking is defined as continuously for at least 6 months)</p> <p>&gt;5 – 10 years old</p> <p>&gt;10 – 18 years old</p> <p>Currently</p>                                                                                                | <p>Yes</p> <p><input type="checkbox"/></p> <p><input type="checkbox"/></p> <p><input type="checkbox"/></p>                                                                                                                                                      | <p>No</p> <p><input type="checkbox"/></p> <p><input type="checkbox"/></p> <p><input type="checkbox"/></p>                                                                 |
| <p>17. Did your household member smoke when you were in the following age groups? (Smoking is defined as continuously for at least 6 months)</p> <p>0 – 12 months old</p> <p>&gt;12 months – 5 years old</p> <p>&gt;5 – 10 years old</p> <p>&gt;10 – 18 years old</p> <p>Currently</p>    | <p>Yes</p> <p><input type="checkbox"/></p> <p><input type="checkbox"/></p> <p><input type="checkbox"/></p> <p><input type="checkbox"/></p> <p><input type="checkbox"/></p>                                                                                      | <p>No</p> <p><input type="checkbox"/></p> <p><input type="checkbox"/></p> <p><input type="checkbox"/></p> <p><input type="checkbox"/></p> <p><input type="checkbox"/></p> |
| <p>18. Did you live in another country or region in the following age groups? (for 1 month or more, including from Hong Kong to mainland China)</p> <p>0 – 12 months old</p> <p>&gt;12 months – 5 years old</p> <p>&gt;5 – 10 years old</p> <p>&gt;10 – 18 years old</p> <p>Currently</p> | <p>Yes, country?</p> <p><input type="checkbox"/> country: _____</p> | <p>No</p> <p><input type="checkbox"/></p> <p><input type="checkbox"/></p> <p><input type="checkbox"/></p> <p><input type="checkbox"/></p> <p><input type="checkbox"/></p> |

**This is the end of the questionnaire. Thank you for your valuable information.**
